# Supplementary material for: Antibody drug conjugates (ADCs) charged with HDAC inhibitor for targeted epigenetic modulation
Source: PubMed Central journal article supplement (PMC6144071; doi:10.1039/c7sc05266a), 2018-07-03
Supplement: SC-009-C7SC05266A-s001.pdf [file SC-009-C7SC05266A-s001.pdf]

Selected data obtained from hepatic microsome digestion of ADC 9

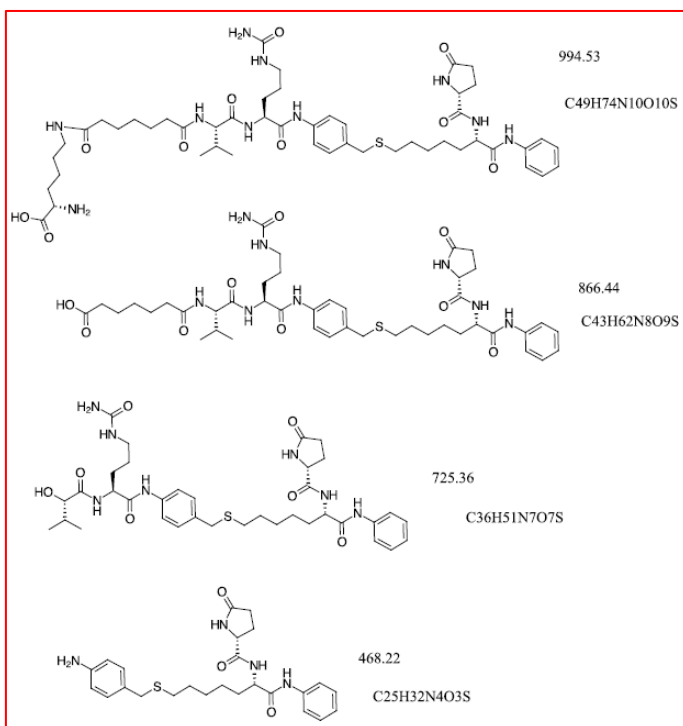

Possible expected metabolites.

Search for mass 467 (M-H)<sup>-</sup> Trace of Single ion current at T= 0, 24, 48 and 72 h respectively.

ad\_hdac\_t\_72\_180604231817

3/04/18 23:19:31

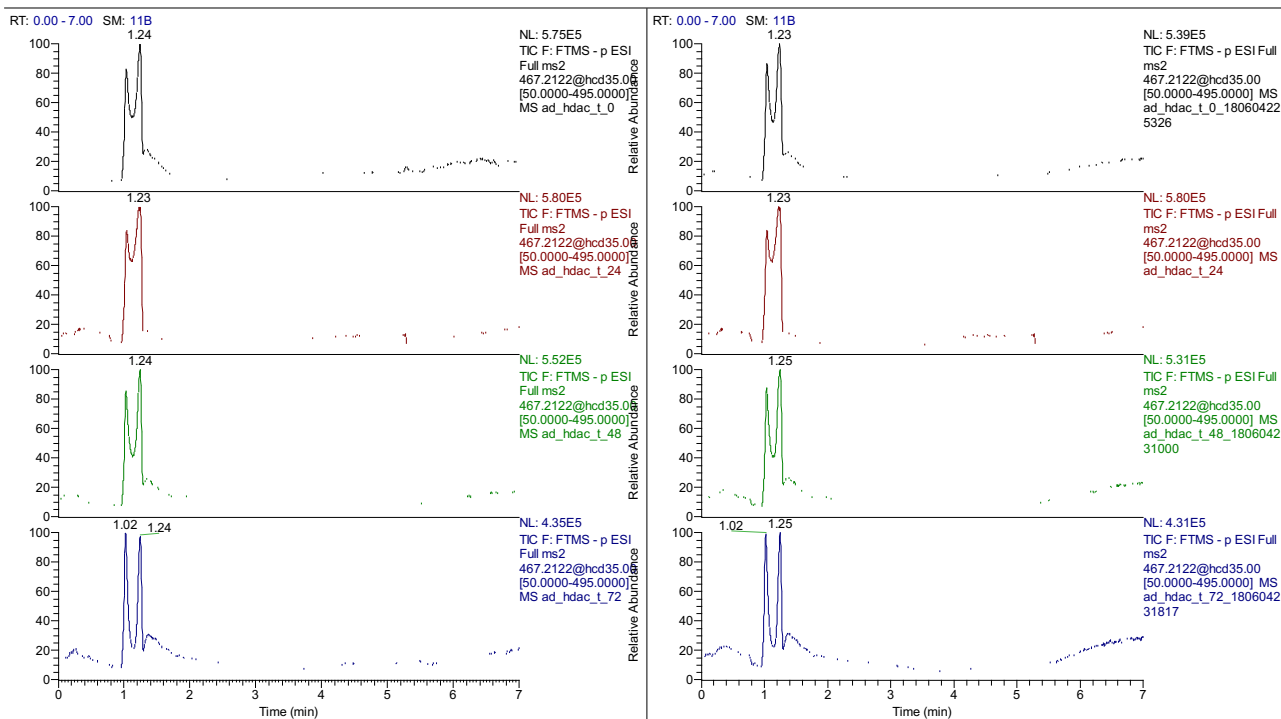

# Search for mass 724, 865 and 993 (M-H).<sup>-</sup> Traces of Single ion current at T= 0, 24, 48 and 72 h respectively

d:\sigma\_tau\...ad\_hdac\_t\_72\_metaboliti

06/05/18 00:09:13

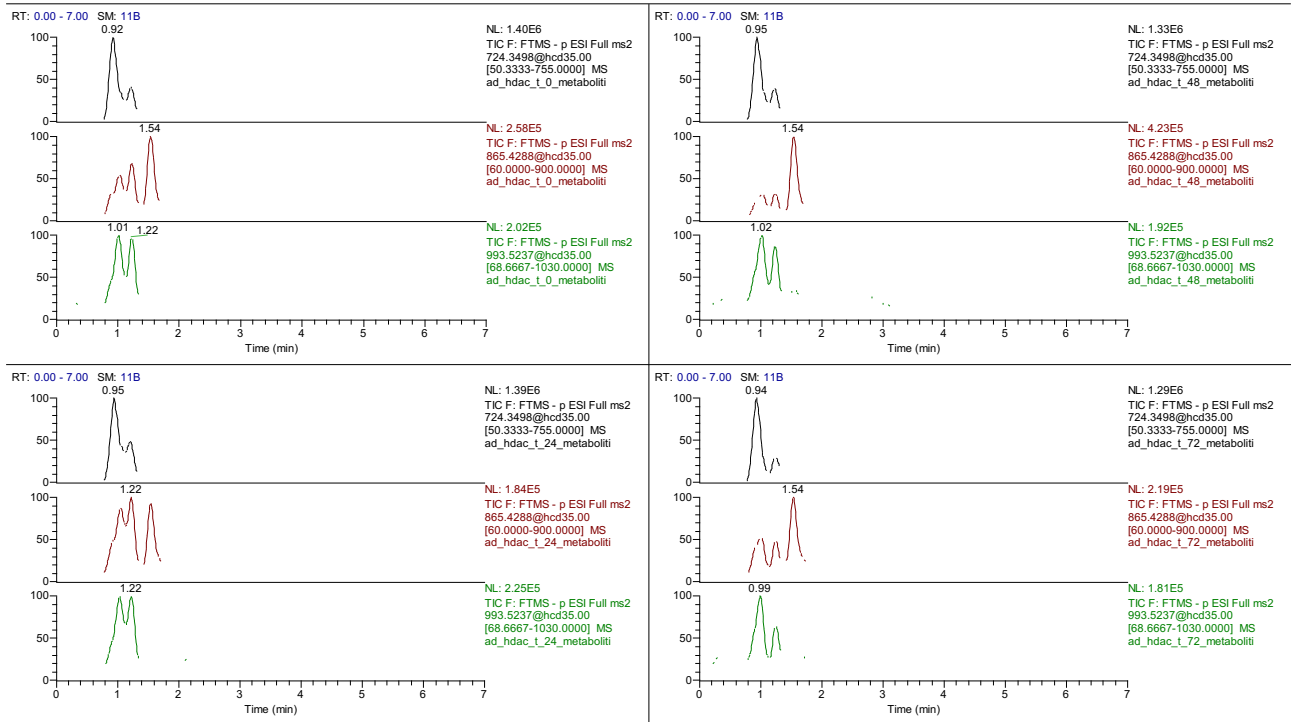

All the values of the peaks area are negligible or completely absent.
